# Supplementary material
Source: PubMed Central journal article supplement (PMC7218423)
Supplement: advancesADV2019001349-suppl1.pdf [file advancesADV2019001349-suppl1.pdf]

## Supplementary Appendix

|                                                                                                                                         |           |
|-----------------------------------------------------------------------------------------------------------------------------------------|-----------|
| <b>HIGH THROUGHPUT SEQUENCING (HTS) METHODOLOGY .....</b>                                                                               | <b>2</b>  |
| <i>Table S1. 37-gene panel.....</i>                                                                                                     | <i>3</i>  |
| <i>Table S2. sAML-like gene mutations in 471 patients tested.....</i>                                                                   | <i>4</i>  |
| <b>EUROPEAN LEUKEMIANET (ELN) GROUP DISTRIBUTIONS.....</b>                                                                              | <b>5</b>  |
| <b>CONSORT DIAGRAM .....</b>                                                                                                            | <b>6</b>  |
| <b>EVENT-FREE SURVIVAL ACCORDING THE PRESENCE OF SAML-LIKE GENE MUTATIONS IN THE<br/>THREE ELN-2017 RISK SUBGROUPS, SEPARATELY.....</b> | <b>7</b>  |
| <i>Figure S1.....</i>                                                                                                                   | <i>7</i>  |
| <b>EVENT-FREE SURVIVAL ACCORDING THE PRESENCE OF SAML-LIKE GENE MUTATIONS IN <i>NPM1</i>-<br/>MUTATED AML.....</b>                      | <b>8</b>  |
| <i>Figure S2.....</i>                                                                                                                   | <i>8</i>  |
| <b>ALLOGENEIC HSCT IN FIRST REMISSION .....</b>                                                                                         | <b>9</b>  |
| PATIENTS ELIGIBLE FOR HSCT.....                                                                                                         | 9         |
| <i>Table S3. Characteristics of patients aged 70 years old or less and eligible for HSCT.....</i>                                       | <i>10</i> |
| TRANSPLANT PROCEDURES .....                                                                                                             | 11        |
| PROGNOSTIC IMPACT OF SAML-LIKE GENE MUTATIONS, CENSORING THE PATIENTS ALLOGRAFTED IN FIRST REMISSION AT<br>TRANSPLANT TIME .....        | 12        |
| <i>Figure S3.....</i>                                                                                                                   | <i>12</i> |
| GRAPHICAL REPRESENTATION OF THE HSCT EFFECT .....                                                                                       | 14        |
| <i>Figure S4A. Simon-Makuch plots for OS from remission by HSCT in SR patients.....</i>                                                 | <i>14</i> |
| <i>Figure S4B. Simon-Makuch plots for OS from remission by HSCT in HR patients.....</i>                                                 | <i>14</i> |
| MULTIVARIABLE ANALYSIS.....                                                                                                             | 15        |
| <i>Table S4. Multivariable analysis of HSCT effect on OS from remission.....</i>                                                        | <i>15</i> |
| <b>LIST OF INVESTIGATORS IN THE ACUTE LEUKEMIA FRENCH ASSOCIATION (ALFA).....</b>                                                       | <b>16</b> |

## High throughput sequencing (HTS) methodology

High throughput sequencing (HTS) of a 37-gene panel (Table S1 below) was done on bone marrow (BM, n=370) or peripheral blood (PB, n=101) samples collected at inclusion in one central lab (Lille, University Hospital, Pr C. Preudhomme). Somatic mutations were identified by 2 orthogonal HTS methods. First, libraries were prepared using the Ampliseq technology and run on Ion Proton according to the manufacturer's instructions (ThermoFisher, Waltham, MA, USA). Raw data were analyzed with two distinct softwares: Torrent Browser (Thermofisher) and SeqNext (JSI Medical System, Los Angeles, CA, USA). Second, libraries were prepared using the Haloplex Target Enrichment System (Agilent Technologies, Santa Clara, CA, USA) and run on MiSeq (Illumina, San Diego, CA, USA). Raw data were also analyzed on two distinct softwares: SureCall (Agilent Technologies) and SeqNext (JSI Medical System). A high depth of coverage (>1500x) was obtained for all genes analyzed with both HTS technologies, allowing detection of variants with a VAF (variant allele frequency) above 1%. Nonsense variants and frameshift insertions or deletions (indels) were always considered as somatic mutations. False sense variants and in frame indels were studied according to the human and public databases of somatic mutations or polymorphisms (SNP) and their VAF. Prediction of functional consequences of variants was performed using 6 prediction software programs: MAPP (Multivariate Analysis of Protein Polymorphism), PhD-SNP (Predictor of human Deleterious Single Nucleotide Polymorphism), PolyPhen-1, PolyPhen-2, SIFT (Sorting Intolerant From Tolerant), SNAP (Screening for Non-Acceptable Polymorphism).<sup>1</sup> Genotyping of *FLT3* internal tandem duplications (*FLT3*-ITD) was done by fragment analysis as previously published and expressed by the ratio ITD/wild type.<sup>2</sup> Because of technical limitations, the duplication of a guanine in position 1934 in *ASXL1* was investigated for all patients by fragment technique and confirmed by Sanger sequencing.<sup>3</sup> Finally, mutation in the *CEBPA* transcription factor gene was carried out using Sanger sequencing.<sup>4</sup> The subset of AML with sAML-like gene mutations was defined by mutation occurring in at least one of the genes listed in Table S2 below.<sup>5</sup>

Table S1. 37-gene panel

| <b>GENE</b>     | <b>LOCUS</b> | <b>NM</b>    | <b>COVERAGE</b>                                      |
|-----------------|--------------|--------------|------------------------------------------------------|
| <i>ASXL1</i>    | 20q11.21     | NM_015338    | exons 11-12 ; exon 12 (AA 574-735) Fragment + Sanger |
| <i>BCOR</i>     | Xp11.4       | NM_001123385 | exons 2-15                                           |
| <i>BCORL1</i>   | Xq26.1       | NM_021946    | exons 1-12                                           |
| <i>CALR</i>     | 19p13.13     | NM_004343.3  | exon 9                                               |
| <i>CEBPA</i>    | 19q13.11     | NM_004364    | exon 1 (Sanger)                                      |
| <i>CBL</i>      | 11q23.3      | NM_005188    | exons 8-9                                            |
| <i>CSF3R</i>    | 1p34.3       | NM_172313.2  | exons 14-18                                          |
| <i>DNMT3A</i>   | 2p23.3       | NM_022552    | exons 2-23                                           |
| <i>ETV6</i>     | 12p13.2      | NM_001987    | exons 1-8                                            |
| <i>EZH2</i>     | 7q36.1       | NM_004456    | exons 2-20                                           |
| <i>FLT3-ITD</i> | 13q12.2      | NM_004119    | exons 14-15 (Fragment)                               |
| <i>FLT3-TKD</i> | 13q12.2      | NM_004119    | exon 20                                              |
| <i>GATA2</i>    | 3q21.3       | NM_032638    | exons 2-6                                            |
| <i>IDH1</i>     | 2q34         | NM_005896    | exon 4                                               |
| <i>IDH2</i>     | 15q26.1      | NM_002168    | exon 4                                               |
| <i>JAK2</i>     | 9p24.1       | NM_004972    | exons 12 & 14                                        |
| <i>KIT</i>      | 4q12         | NM_000222    | exons 8-11 & exon 17                                 |
| <i>KRAS</i>     | 12p12.1      | NM_033360    | exons 2-3                                            |
| <i>MPL</i>      | 1p34.2       | NM_005373    | exon 10                                              |
| <i>NIPBL</i>    | 5p13.2       | NM_133433    | exons 2-47                                           |
| <i>NPM1</i>     | 5q35.1       | NM_002520    | exon 11                                              |
| <i>NRAS</i>     | 1p13.2       | NM_002524    | exons 2-3                                            |
| <i>PHF6</i>     | Xq26.2       | NM_001015877 | exons 2-10                                           |
| <i>PTPN11</i>   | 12q24.13     | NM_002834    | exons 3 & 13                                         |
| <i>RAD21</i>    | 8q24.11      | NM_006265    | exons 2-14                                           |
| <i>RIT1</i>     | 1q22         | NM_006912    | exon 5                                               |
| <i>RUNX1</i>    | 21q22.12     | NM_001001890 | exons 1-6                                            |
| <i>SETBP1</i>   | 18q12.3      | NM_015559    | exon 4                                               |
| <i>SF3B1</i>    | 2q33.1       | NM_012433    | exons 13-16                                          |
| <i>SMC1A</i>    | Xp11.22      | NM_006306    | exons 1-25                                           |
| <i>SMC3</i>     | 10q25.2      | NM_005445    | exons 1-29                                           |
| <i>SRSF2</i>    | 17q25.1      | NM_003016    | exon 1                                               |
| <i>STAG2</i>    | Xq25         | NM_001042749 | exons 3-35                                           |
| <i>TET2</i>     | 4q24         | NM_001127208 | exons 3-11                                           |
| <i>TP53</i>     | 17p13.1      | NM_001126112 | exons 3-11                                           |
| <i>U2AF1</i>    | 21q22.3      | NM_006758    | exons 2 & 6                                          |
| <i>WT1</i>      | 11p13        | NM_024426    | exons 7 & 9                                          |
| <i>ZRSR2</i>    | Xp22.2       | NM_005089    | exons 1-11                                           |

Table S2. sAML-like gene mutations in 471 patients tested

| Gene         | Locus    | RefSeq       | ALFA panel  | Missing exons * | Mutation frequency, N (%) |
|--------------|----------|--------------|-------------|-----------------|---------------------------|
| <i>ASXL1</i> | 20q11.21 | NM_015338    | exons 11-12 | 1-10 & 13       | 89 (19%)                  |
| <i>SRSF2</i> | 17q25.1  | NM_003016    | exon 1      | none            | 83 (18%)                  |
| <i>STAG2</i> | Xq25     | NM_001042749 | exons 2-35  | none            | 39 (8%)                   |
| <i>BCOR</i>  | Xp11.4   | NM_001123385 | exons 2-15  | none            | 38 (8%)                   |
| <i>U2AF1</i> | 21q22.3  | NM_006758    | exons 2 & 6 | none            | 32 (7%)                   |
| <i>EZH2</i>  | 7q36.1   | NM_004456    | exons 2-20  | none            | 26 (6%)                   |
| <i>SF3B1</i> | 2q33.1   | NM_012433    | exons 13-16 | 1-12 & 17-25    | 23 (4%)                   |
| <i>ZRSR2</i> | Xp22.2   | NM_005089    | exons 1-11  | none            | 10 (2%)                   |

A total of 471 (93%) of the 509 patients were tested using a 37-gene myeloid panel. Presence of at least one gene mutation among this list of gene retained by Lindsley *et al.* was used to define sAML-like patients.<sup>5</sup>

## References

1. Bendl J, Stourac J, Salanda O, et al. PredictSNP: robust and accurate consensus classifier for prediction of disease-related mutations. *PLoS Comput Biol.* 2014;10(1):e1003440.
2. Renneville A, Boissel N, Nibourel O, et al. Prognostic significance of DNA methyltransferase 3A mutations in cytogenetically normal acute myeloid leukemia: a study by the Acute Leukemia French Association. *Leukemia.* 2012;26(6):1247-1254.
3. Duployez N, Marceau-Renaut A, Boissel N, et al. Comprehensive mutational profiling of core binding factor acute myeloid leukemia. *Blood.* 2016;127(20):2451-2459.
4. Preudhomme C, Sagot C, Boissel N, et al. Favorable prognostic significance of *CEBPA* mutations in patients with de novo acute myeloid leukemia: a study from the Acute Leukemia French Association (ALFA). *Blood.* 2002;100(8):2717-2723.
5. Lindsley RC, Mar BG, Mazzola E et al. Acute myeloid leukemia ontogeny is defined by distinct somatic mutations. *Blood.* 2015;125(9):1367-1376.

## European LeukemiaNet (ELN) group distributions

Cytogenetic and genomic characteristics were centrally reviewed during the study in order to classify the patients within the ELN-2010 classification subgroups,<sup>1</sup> used for allogeneic HSCT eligibility in first remission. Standard Sanger PCR was used to detect *CEBPA* and *NPM1* gene mutations and fragment analysis to determine *FLT3*-ITD allelic ratios. Biallelic *CEBPA* gene mutations only were retained to classified cases as of favorable risk. Overall, 74 (15%), 312 (61%) and 86 (17%) patients were prospectively classified as with favorable-, intermediate- and adverse-risk AML, respectively. In order to classify all patients for transplantation *versus* no-transplantation indication, the remaining 37 patients (7%) were prospectively classified as follows: 29 patients with cytogenetic failure and no favorable gene mutation were allocated to the intermediate-risk subgroup, while 8 patients with less than 20 normal metaphases, no abnormal metaphase and favorable gene mutations were allocated to the favorable-risk group.

At the end of the study, gene mutation patterns, including *ASXL1*, *RUNX1* and *TP53* mutational status, were retrospectively determined by next-generation sequencing in 471 (93%) of the 509 patients using a 37-gene myeloid panel, allowing reclassification of 493 of the 509 (97%) study patients within the recently updated ELN 2017 classification.<sup>2</sup>

## References

1. Döhner H, Estey EH, Amadori S et al. Diagnosis and management of acute myeloid leukemia in adults: recommendations from an international expert panel, on behalf of the European LeukemiaNet. *Blood*. 2010;115(3):453-474.
2. Döhner H, Estey E, Grimwade D et al. Diagnosis and management of AML in adults: 2017 ELN recommendations from an international expert panel. *Blood*. 2017;129(4):424-447.

## CONSORT diagram

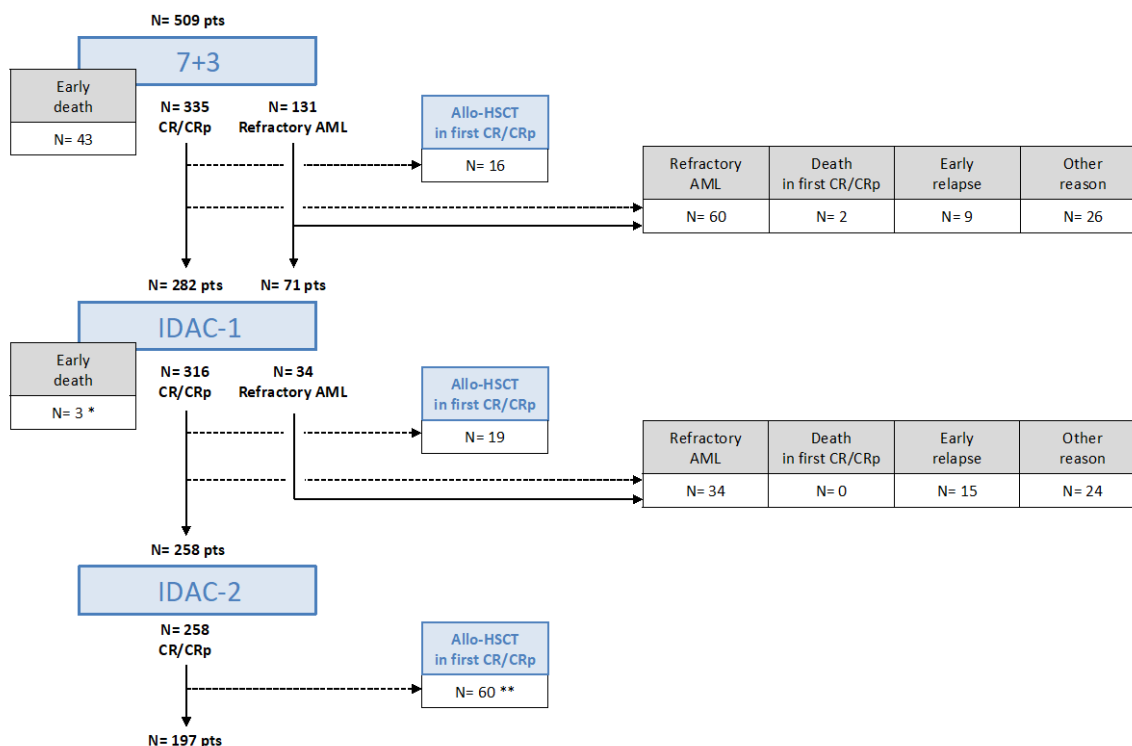

\*: these 3 patients received the first IDAC course as salvage, as not in CR/CRp after the first induction course; \*\*: including 2 patients with favorable-risk AML, thus not eligible for HSCT in first remission per protocol.

In the original version of the protocol, four additional 1+5 low-intensity maintenance courses were planned after the second IDAC course in non-transplanted patients. Fifty-six patients only actually received these low-intensity courses, as such maintenance was abandoned by amendment on February 2013 due to a poor adherence of physicians in most centers. By the same amendment, cytarabine dosage was reduced to 1g/m<sup>2</sup>/12h during consolidation courses above 70 years of age, instead of 75 years of age as originally recommended. Administration of maintenance courses, however, did not influence neither relapse incidence nor survival rates (data not shown).

## Event-free survival according the presence of sAML-like gene mutations in the three ELN-2017 risk subgroups, separately

Figure S1

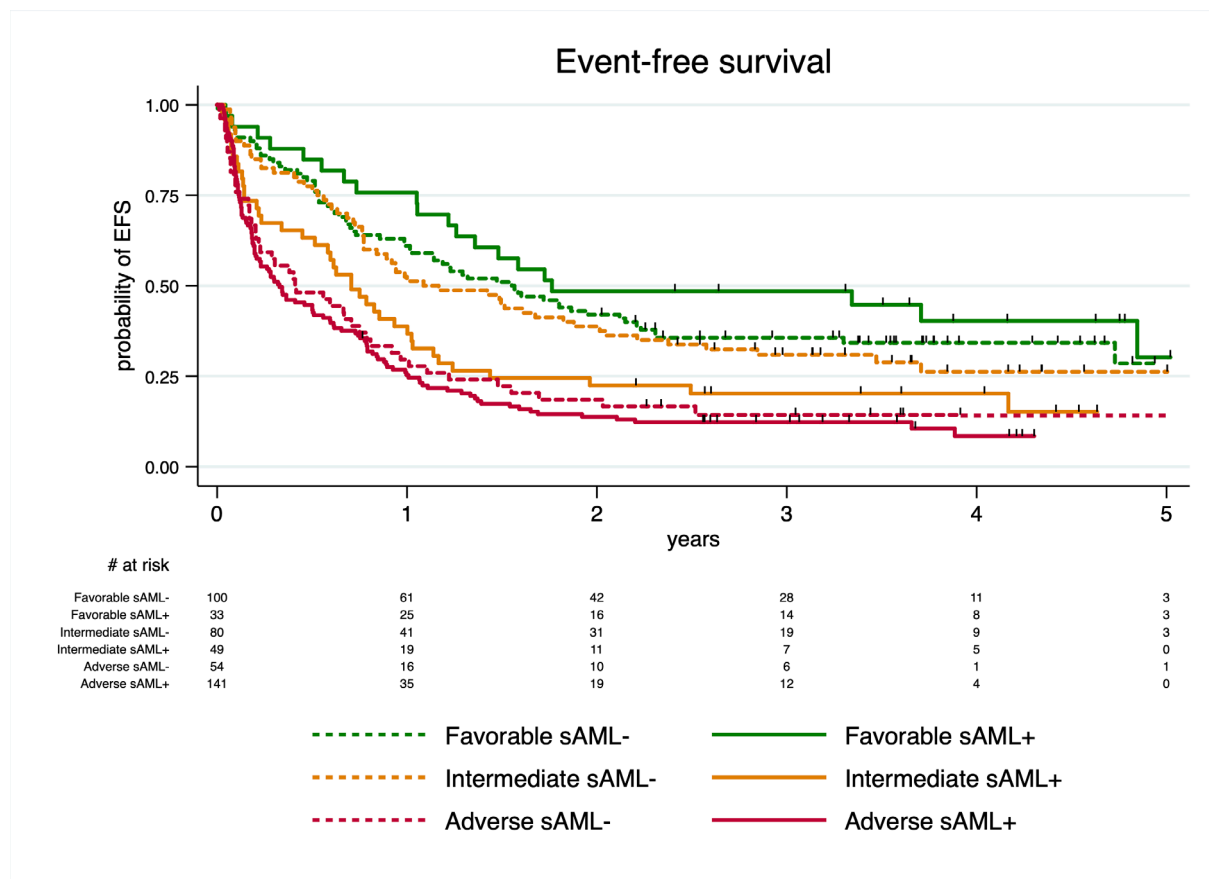

EFS according to sAML-like mutations in the three ELN-2017 risk subgroups, separately. The presence of sAML-like gene mutations did not influence EFS in the favorable-risk (HR, 0.78 [95% CI, 0.47-1.28];  $P= 0.32$ ) nor in the adverse-risk (HR, 1.12 [95% CI, 0.80-1.57];  $P= 0.51$ ) subgroup, while in the intermediate-risk subgroup these mutations (by definition other than *ASXL1* mutation here) retained their prognostic value (HR, 1.52 [95% CI, 1.01-2.28];  $P= 0.044$ ).

## Event-free survival according the presence of sAML-like gene mutations in *NPM1*-mutated AML

Figure S2

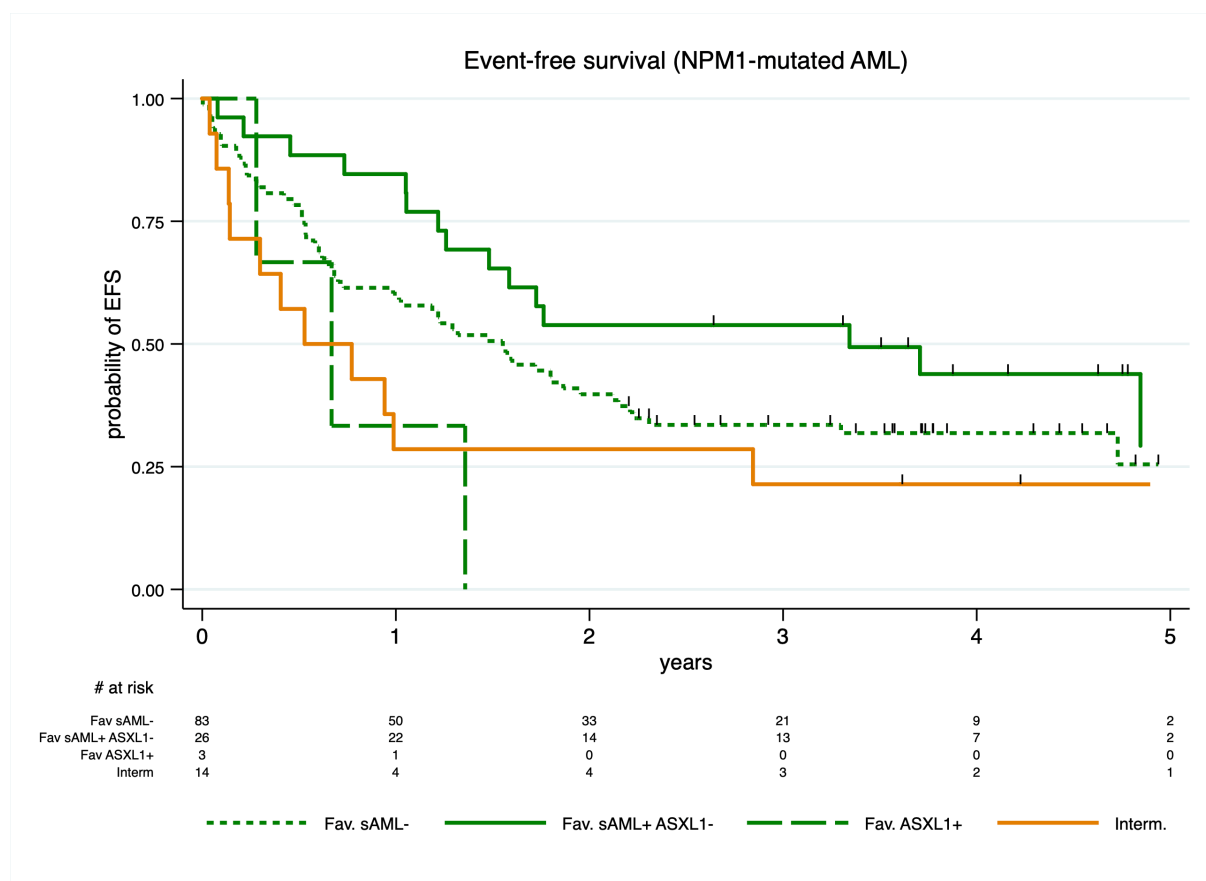

EFS according to sAML-like mutations in the *NPM1*-mutated AML subgroup. Among the 127 *NPM1*-mutated AML cases tested for sAML-like mutations, 112, 14 and 1 could be classified in the ELN-2017 favorable, intermediate and adverse risk subgroup, respectively. Among these 112 favorable-risk cases, one or more sAML-like gene mutations were detected in 29 cases (including 3 *ASXL1* mutations). Among the 14 intermediate-risk cases (all with high ratio *FLT3*-ITD mutation), sAML-like gene mutations were only detected in 2 patients. As illustrated in the Figure S2 above, among the 112 favorable-risk patients, the presence of sAML-like gene mutations other than *ASXL1* did not alter EFS (HR, 0.64 [95% CI, 0.36-1.13];  $p=0.12$ ).



## **Allogeneic HSCT in first remission**

### **Patients eligible for HSCT**

According to the study design, 305 CR/CRp patients with ELN 2010 intermediate or adverse risk AML were eligible for allogeneic HSCT. A total of 93 eligible patients were actually transplanted in first remission, including only 3 patients older than 70 years.

The role of HSCT was thus evaluated in the 211 eligible patients aged 70 years or less, 90 of them being transplanted (43%). Characteristics of the 90 *versus* the 121 non-transplanted patients are shown in the Table S3 below. Notwithstanding a lower median age of the transplanted patients, other characteristics of the transplant and no-transplant cohorts were well-balanced. In the 90 transplanted patients, median time from remission to transplant was 113 days (IQR, 80-134). Hematopoietic stem cell source was a sibling donor, a matched unrelated donor, a related haplo-identical donor or cord blood units in 28, 50, 8 and 4 patients, respectively. Conditioning regimen, not specified by the protocol was fludarabine/busulfan (FB)-based in 66 patients, FB-TBI in 12 patients, sequential FLAMSA-type conditioning in 12 patients, and a more intensive FB-based conditioning in 1 patient.

With a median follow-up of 3.8 years, 124 out of these 211 patients aged 70 years old or less and eligible for HSCT in first remission eventually relapsed, including 26 relapses in transplanted patients. Forty-three patients received an intensive salvage treatment, 37 (30%) achieved a second remission and 18 (15%) were transplanted after relapse, including 13 transplantation in second remission. Overall, median EFS was 17.2 months (95% CI, 12.8-20.7) and 4-year EFS was estimated at 29% (95% CI, 23-36). Median OS was 33.2 months (95% CI, 24.8-46.1) and 4-year OS was estimated at 42% (95% CI, 25-50). Median RFS was 15.9 months (95% CI, 11.3-19.1) and 4-year RFS was estimated at 29% (95% CI, 23-36). In patients who received HSCT, cumulative incidences of relapse (CIR), respectively non-relapse mortality (CINRM) after HSCT, was estimated from the date of transplant, non-relapse related death, respectively relapse, being considered as a competing event. At 2 years, cumulative incidences of relapse and non-relapse mortality were 23% (95% CI, 16-34) and 19% (95% CI, 12-29), respectively.

Table S3. Characteristics of patients aged 70 years old or less and eligible for HSCT

|                                             | No HSCT<br>in first remission | HSCT<br>in first remission | P value |
|---------------------------------------------|-------------------------------|----------------------------|---------|
| <b>Patients, N</b>                          | 121                           | 90                         | -       |
| Gender, M/F                                 | 67/54                         | 53/38                      | 0.78    |
| Median age (range)                          | 66 years (60-70)              | 64 years (60-70)           | 0.0037  |
| ECOG-PS, 0/1/2+/NA                          | 50/57/11/3                    | 47/35/8/0                  | 0.32    |
| HCT-CI, 0/1/2/3+/NA                         | 53/28/13/25/2                 | 52/14/8/13/3               | 0.11    |
| Secondary AML, N (%)                        | 12 (10%)                      | 17 (19%)                   | 0.071   |
| Therapy-related AML, N (%)                  | 7 (6%)                        | 3 (3%)                     | 0.52    |
| <b>ELN-2010 risk group, N (%)</b>           | -                             | -                          | 0.51    |
| Favorable *                                 | 2 (2%)                        | 0 (0%)                     | -       |
| Intermediate                                | 95 (78%)                      | 75 (83%)                   | -       |
| Adverse                                     | 24 (20%)                      | 15 (17%)                   | -       |
| <b>ELN 2017 risk group, N (%)</b>           | -                             | -                          | 0.16    |
| Favorable risk *                            | 26 (21%)                      | 12 (13%)                   | -       |
| Intermediate risk                           | 46 (38%)                      | 37 (41%)                   | -       |
| Adverse risk                                | 43 (36%)                      | 40 (45%)                   | -       |
| Not available                               | 6 (5%)                        | 1 (1%)                     | -       |
| <b>SR/HR risk groups, N classifiable **</b> | -                             | -                          | 0.56    |
| Standard-risk (SR)                          | 52                            | 37                         | -       |
| High-risk (HR)                              | 54                            | 47                         | -       |

\*: the 2 patients with ELN 2010 favorable-risk AML were eligible for transplantation, as they needed two courses to reach remission; of note, the 36 additional patients with ELN 2017 favorable-risk AML were not representative of a general cohort of favorable-risk patients, as they could not have ELN 2010 favorable-risk AML to be eligible for transplantation according to the protocol. \*\*: 190 of these 211 patients were eventually classified in the standard-risk (ELN 2017 intermediate risk without sAML-like gene mutation or ELN 2017 favorable risk AML) or high-risk (ELN 2017 intermediate risk with sAML-like mutation or ELN 2017 adverse risk AML) subgroup.

## **Transplant procedures**

In the 93 eligible patients who received allogeneic HSCT in first remission, the median time from remission to transplant was 113 days (IQR, 80-134). Hematopoietic stem cell source was a sibling donor, a matched unrelated donor, a related haplo-identical donor or cord blood units in 28, 52, 8 and 5 patients, respectively. Conditioning regimen, not specified by the protocol was fludarabine/busulfan (FB)-based in 68 patients, FB-TBI in 13 patients, sequential FLAMSA-type conditioning in 12 patients, and a more intensive FB-based conditioning in 1 patient. In patients who received HSCT, 2-year cumulative incidences of relapse and non-relapse mortality were 25% (95% CI, 17-35) and 19% (95% CI, 13-29), respectively.

**Prognostic impact of sAML-like gene mutations, censoring the patients  
allografted in first remission at transplant time**

Figure S3

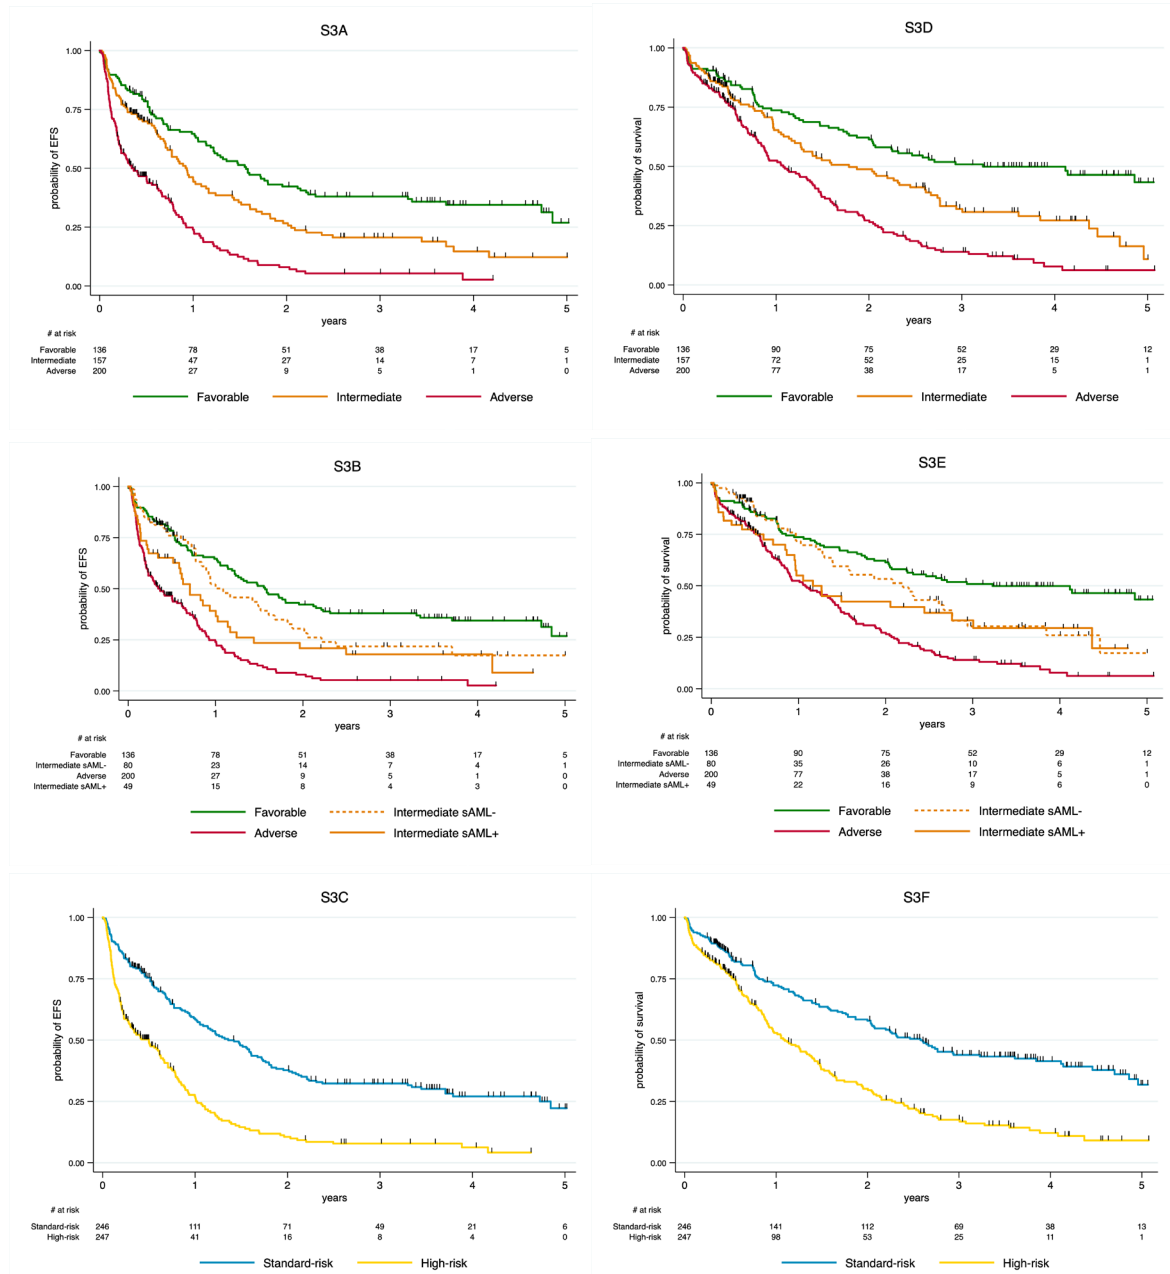

**S3A.** EFS according to the three ELN-2017 risk subgroups ( $P < 0.001$ ). At 2 years, EFS was estimated at 42.3% (95% CI, 33.5-50.8), 26.7% (95%CI, 18.7-35.2) and 8.0% (95% CI, 4.0-13.7) in the favorable-, intermediate- and adverse-risk, respectively. At 4 years, EFS was estimated at 34.5% (95% CI, 25.9-43.1), 14.7% (95%CI, 7.9-23.5) and 2.7% (95% CI, 0.4-9.6) in the favorable-, intermediate- and adverse-risk, respectively.

**S3B.** EFS according to sAML-like mutations in the ELN-2017 intermediate-risk subgroup. The presence of sAML-like gene mutations did not significantly influence EFS in the ELN-2017 intermediate-risk subgroup, even if a trend for a worse EFS was observed (HR, 1.44 [95% CI, 0.93-2.24];  $P = 0.10$ ).

**S3C.** EFS according to the newly defined HR/SR risk groups. EFS was significantly reduced in the HR group (HR, 2.41 [95% CI, 1.93-3.01];  $p < 0.001$ ). At 2 years, EFS was estimated at 37.7% (95% CI, 31.0-44.4) in the SR group, as compared to 10.6% (95%CI, 6.4-15.9) in the HR group. At 4 years, EFS was estimated at 27.1% (95% CI, 20.6-34.0) in the SR group, as compared to 6.2% (95%CI, 2.8-11.6) in the HR group.

**S3D.** OS according to the three ELN-2017 risk subgroups ( $P < 0.001$ ). At 2 years, OS was estimated at 61.4% (95% CI, 52.3-69.3), 48.8% (95%CI, 39.5-57.5) and 27.2% (95% CI, 20.3-34.5) in the favorable-, intermediate- and adverse-risk, respectively. At 4 years, OS was estimated at 49.9% (95% CI, 40.6-58.4), 27.2% (95%CI, 18.5-36.7) and 7.8% (95% CI, 3.6-14.2) in the favorable-, intermediate- and adverse-risk, respectively.

**S3E.** OS according to sAML-like mutations in the ELN-2017 intermediate-risk subgroup. The presence of sAML-like gene mutations did not significantly influence OS in the ELN-2017 intermediate-risk subgroup (HR, 1.26 [95% CI, 0.79-2.06];  $P = 0.32$ ).

**S3F.** OS according to the newly defined HR/SR risk groups. OS was significantly reduced in the HR group (HR, 2.14 [95% CI, 1.69-2.71];  $p < 0.001$ ). At 2 years, OS was estimated at 57.9% (95% CI, 50.8-64.3) in the SR group, as compared to 30.2% (95%CI, 23.7-36.8) in the HR group. At 4 years, OS was estimated at 41.4% (95% CI, 34.2-48.5) in the SR group, as compared to 12.1% (95%CI, 7.4-18.1) in the HR group.

## Graphical representation of the HSCT effect

Figure S4A. Simon-Makuch plots for OS from remission by HSCT in SR patients

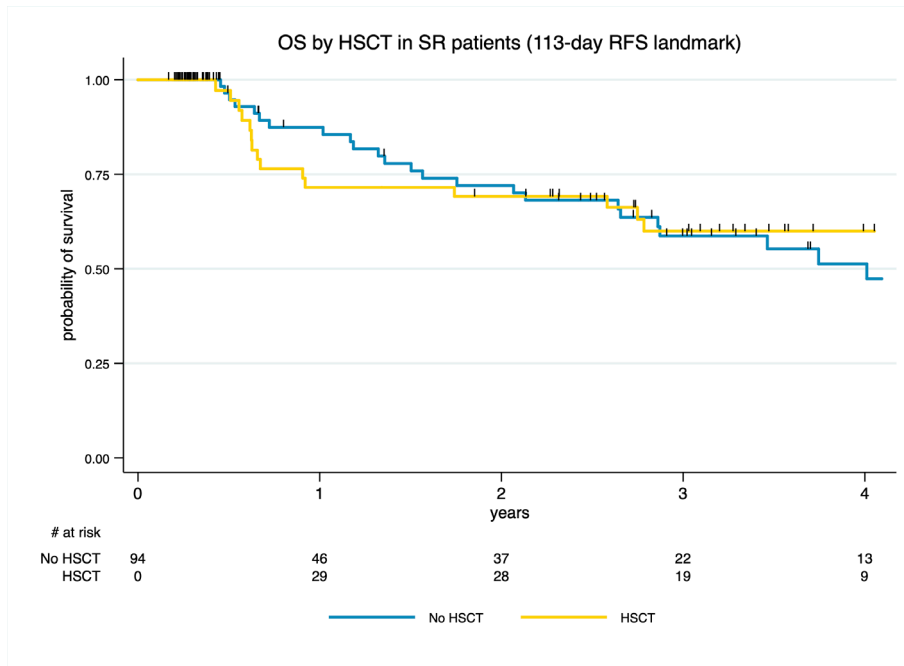

Figure S4B. Simon-Makuch plots for OS from remission by HSCT in HR patients

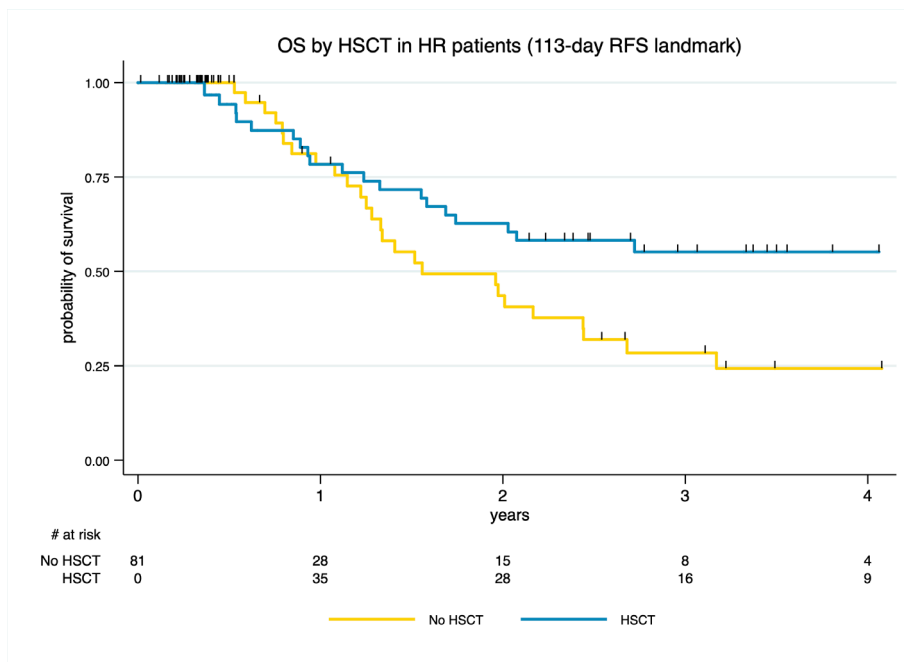

## Multivariable analysis

Table S4 below summarizes the results of multivariable prognostic analysis for OS from remission, included HSCT in first remission as a time-dependent variable. As shown, transplantation was still significantly associated with prolonged OS from remission in patients with high-risk AML, while not in those with standard-risk AML.

*Table S4. Multivariable analysis of HSCT effect on OS from remission*

|                                                           | HR   | 95% CI    | P values |
|-----------------------------------------------------------|------|-----------|----------|
| <b>Patients aged 60 to 70 years old eligible for HSCT</b> |      |           |          |
| <b>All patients</b>                                       |      |           |          |
| HSCT in first remission                                   | 0.61 | 0.38-0.98 | 0.041    |
| High-risk versus standard-risk AML                        | 1.78 | 1.13-2.80 | 0.013    |
| Age                                                       | 1.03 | 0.95-1.11 | 0.50     |
| ECOG-PS $\geq 2$                                          | 2.43 | 1.11-5.28 | 0.026    |
| HCT-CI $\geq 3$                                           | 1.34 | 0.77-2.32 | 0.30     |
| WBC $\geq 50$ G/L                                         | 1.20 | 0.60-2.42 | 0.61     |
| Clinically defined sAML                                   | 0.88 | 0.42-1.84 | 0.74     |
| <b>Patients with standard-risk AML</b>                    |      |           |          |
| HSCT in first remission                                   | 0.89 | 0.45-1.78 | 0.75     |
| Age                                                       | 1.04 | 0.93-1.17 | 0.44     |
| ECOG-PS $\geq 2$                                          | 0.53 | 0.12-2.39 | 0.41     |
| HCT-CI $\geq 3$                                           | 0.80 | 0.35-1.83 | 0.60     |
| WBC $\geq 50$ G/L                                         | 0.86 | 0.37-2.02 | 0.73     |
| Clinically defined sAML                                   | 0.73 | 0.16-3.27 | 0.68     |
| <b>Patients with high-risk AML</b>                        |      |           |          |
| HSCT in first remission                                   | 0.43 | 0.22-0.85 | 0.015    |
| Age                                                       | 0.99 | 0.89-1.10 | 0.87     |
| ECOG-PS $\geq 2$                                          | 10.1 | 4.03-30.0 | <0.001   |
| HCT-CI $\geq 3$                                           | 1.67 | 0.77-3.59 | 0.19     |
| WBC $\geq 50$ G/L                                         | 6.31 | 1.69-23.5 | 0.006    |
| Clinically defined sAML                                   | 0.92 | 0.37-2.25 | 0.85     |

Extended Cox models including allogeneic HSCT in first remission as a time-dependent covariate were performed in patients aged 60 to 70 years old eligible for HSCT as defined by the protocol, using a 113-day RFS landmark. HR, hazard ratio; CI, confidence interval; ECOG-PS, ECOG performance status; HCT-CI, hematopoietic cell transplantation comorbidity index; WBC, white blood cell count.

## List of investigators in the Acute Leukemia French Association (ALFA)

C. Gardin, T. Braun, B. Papoular, S. Brechignac, J. Soret, G. Edouart, A. Douay, V. Eclache, R. Letestu (Hôpital Avicenne, Bobigny); JP. Marolleau, B. Gruson, D. Lebon, A. Charbonnier, V. Harrivel, A. Aleme, A. Hubert (CHU, Amiens); A. Al Jijakli, D. Chaoui, P. Genet, R. Skhiri, T. Guerekobaya, S. Talfi, M. Dubief (CH, Argenteuil); B. Choufi, M. Barry, M. Brument, J. Monvoisin, A. Ducrocq (CH, Boulogne/Mer); O. Reman, S. Chantepie, L. Damaj Ghandi, M. Macro, S. Cheze, H. Johnson Ansah, JB. Mear, D. Naguib, V. Salaun, N. Cornet, E. Marin (CHU, Caen); JV. Malfuson, J. Konopacki, A. Segot, F. de Charry, V. Foissaud, D. Bories (Hôpital Percy, Clamart); C. Salanoubat, S. Haiat, A. Devidas, B. Joly, C. Petitdidier, S. Cereja, H. Mossafa, I. Lemaire, P. Quillet, N. Hadjadj, (CH, Corbeil); C. Pautas, C. Cordonnier, S. Maury, A. Toma, Y. Hicheri, D. Bories, O. Wagner-Ballon, L. Cabanne, Y. Naitsidenas (Hôpital Henri Mondor, Créteil); M. Bemba, F. Bonnevie, M. Wetterwald, C. Delattre, C. Roche-Lestienne, V. Paquez (CH, Dunkerque); S. de Botton, JH. Bourhis, JB. Micol, N. Auger, V. Saada, L. Amghar (Institut Gustave Roussy, Villejuif); B. Quesnel, C. Berthon, H. Debarri, MO. Petillon, C. Roche-Lestienne, C. Preudhomme, O. Nibourel, C. Roumier, F. Dumezy, C. Rodriguez, C. Frimat, H. Djeda (CHU, Lille); P. Turlure, S. Girault, MP Gourin, P Chaury, MJ. Rapp, S. Moreau, L. Remenieras N. Gachard, F. Trimoreau, J. Abraham, M. Touati, J. Feuillard, E. Guerin, C. Philippon (CHU, Limoges); X. Thomas, F. Nicolini, L. Gilis, S. Ducastelle-Lepretre, L. Lebras, E. Wattel, F. Baracco, E. Paubelle, M. Balsat, MV. Larcher, H. Labussière, M. Michallet, S. Hayette, A. Plesa, D. Manzoni, I. Tigaud, M. Elhamri, A. Deloire, O. Le Borgne (Hôpital Lyon Sud, Lyon); J. Frayfer, W. Abarah, L. Fouillard, A. Cung, V. Gobert, MA. Ahui Brou (CH, Meaux); L. Gastaud, A. Thyss, F. Peyrade, S. Raynaud, I. Arnoux, C. Debaigt, A. Gama (Centre Lacassagne, Nice); T. Cluzeau, L. Manonne, M. Loschi, S. Raynaud, C. Hathroubi (CHU, Nice); O. Hermine, A. Marçais, F. Suarez, R. Delarue, C. Brouzes, N. Chapuis, T. Saheb (Hôpital Necker, Paris); H. Dombret, E. Raffoux, N. Boissel, E. Lengliné, F. Rabian, AM. Ronchetti, P. Fenaux L. ades, M. Sebert, C. Bally, R. Rahme, O. Maarek, S. Mathis, A. Raimbault, K. Celli-Lebras, R. Grapin, F. Hilaire, AS. Debrie, L. Amghar, I. Chouikh (Hôpital Saint-Louis, Paris); R. Benramdane, I. Vaida, H. Gonzalez, D. Mallet, C. Terré, V. Barriere, M. Amirault, J. Limea (CH, Pontoise); I. Plantier, M. Wemeau, L. Detourmignies, Dervite, A. Fawaz, C. Ghevaert, K. Dernivoix, C. Trouillet, Q. Dhalluin (CH, Roubaix); H. Tilly, E. Lemasle, N. Contentin, A. Stamatoulas, F. Jardin, S. Lepretre, P. Lenain, C.



Boutet, E. Bera, S. Vaudaux, V. Bayon, Y. Atia (Centre Henri Becquerel, Rouen); J. Vargaftig, S. Glaisner, C. Soussain, C. Terré, H. Bennani, V. Bardet, P. Vavasseur, (Centre Rene Huguenin, Saint-Cloud); P. Rousselot, H. Farhat, S. Ghez, J. Lambert, S. Rigaudeau, AL. Taksin, C. Terré, I. Garcia, S. Raggueneau, C. Fandomtchomgouo, C. Constant (CH, Versailles); J. Fernandes, N. Cambier, JP. Pollet, M. Simon, S. Tricot, A. Daudignon, H. Bisiau, C. Hemar, M. Fery (CH, Valenciennes), C. Rose, B. Carpentier, L. Pascal, N. Cambier, A. Charpentier, S. Waucampt, D. Brzyski, (CH, Lille Saint Vincent); GM. Pica, F. Prieur, A. Courouau (CH Métropole Savoie, Chambéry).
